# Supplementary material for: In situ generation, metabolism and immunomodulatory signaling actions of nitro-conjugated linoleic acid in a murine model of inflammation
Source: PubMed Central journal article supplement — Redox Biol. 2018 Jan 12;15:522–31. doi: 10.1016/j.redox.2018.01.005 (PMC5881417; doi:10.1016/j.redox.2018.01.005), 2018-01-12
Supplement: mmc1.pdf [file mmc1.pdf]

## SUPPLEMENTARY INFORMATION FOR

### ***In situ* generation, metabolism and immunomodulatory signaling actions of nitro-conjugated linoleic acid in a murine model of inflammation**

Luis Villacorta<sup>1,\*</sup>, Lucia Minarrieta<sup>2,3</sup>, Sonia R. Salvatore<sup>4</sup>, Nicholas K. Khoo<sup>4</sup>, Oren Rom<sup>1</sup>, Zhen Gao<sup>1</sup>, Rebecca C. Berman<sup>1</sup>, Soma Jobbagy<sup>4</sup>, Lihua Li<sup>4</sup>, Steven R. Woodcock<sup>4</sup>, Y. Eugene Chen<sup>5</sup>, Bruce A. Freeman<sup>4</sup>, Ana M. Ferreira<sup>2</sup>, Francisco J. Schopfer<sup>4</sup> and Dario A. Vitturi<sup>4,\*</sup>.

<sup>1</sup>Department of Internal Medicine and <sup>5</sup>Department of Cardiac Surgery, Frankel Cardiovascular Center, University of Michigan Medical Center, Ann Arbor, MI, USA.; <sup>2</sup>Cátedra de Inmunología, Facultad de Química y Ciencias, Universidad de la República, Montevideo, Uruguay; <sup>3</sup>Institute of Infection Immunology, TWINCORE. Hannover, Germany; <sup>4</sup>Department of Pharmacology and Chemical Biology, University of Pittsburgh. Pittsburgh, PA, USA.

\* Co-corresponding authors.

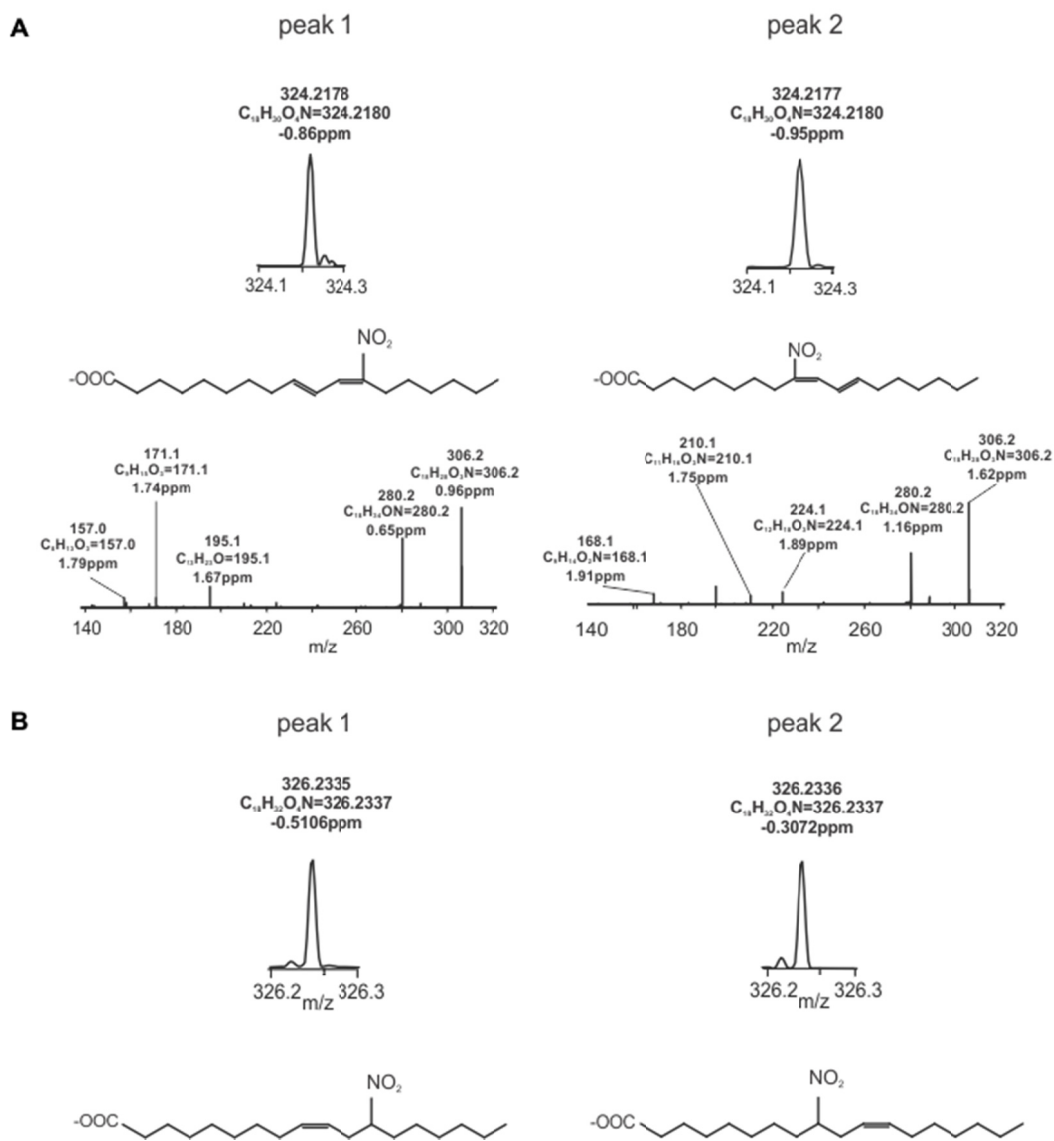

**Figure S1: Structural confirmation for macrophage-generated NO<sub>2</sub>-CLA and dihydro-NO<sub>2</sub>-CLA.** A) High-resolution LC-MS atomic composition determination, chemical structure and MS<sup>2</sup> fragmentation analysis for 12-NO<sub>2</sub>-CLA (peak 1) and 9-NO<sub>2</sub>-CLA (peak 2) respectively. B) High-resolution LC-MS atomic composition and chemical structure for dihydro-12-NO<sub>2</sub>-CLA (peak 1) and dihydro-9-NO<sub>2</sub>-CLA (peak 2) metabolites.

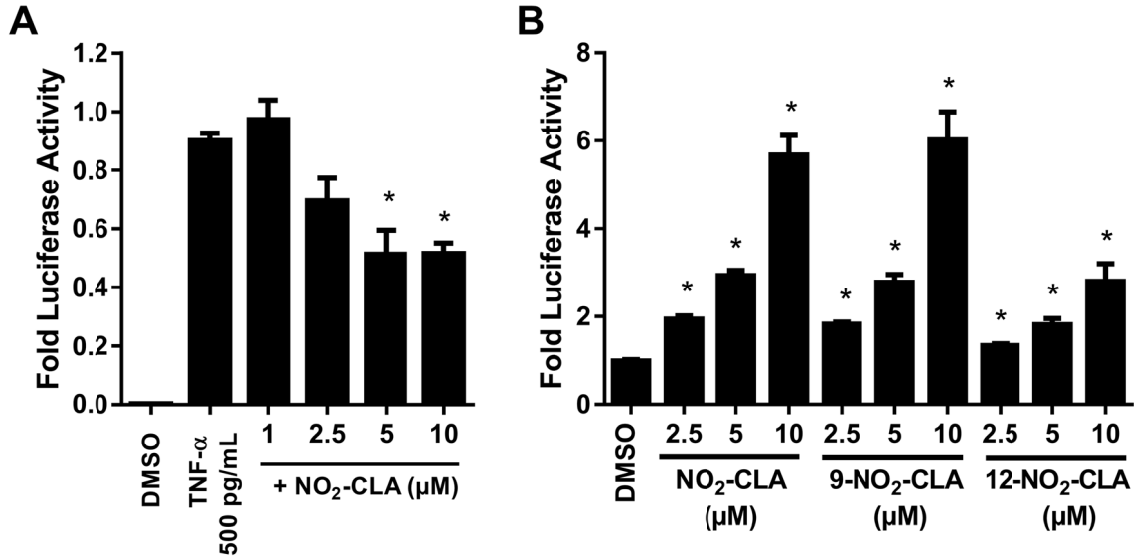

**Figure S2: NO<sub>2</sub>-CLA inhibits NF- $\kappa$ B-dependent gene expression and activates ARE/Nrf2-regulated transcription.** A) Inhibition of NF- $\kappa$ B-dependent luciferase expression by NO<sub>2</sub>-CLA in a HEK293 reporter cell line. B) NO<sub>2</sub>-CLA stimulates Nrf2-dependent luciferase expression in a HepG2-based reporter cell line. Data are presented as mean  $\pm$  SEM, \*  $p < 0.05$  vs. TNF- $\alpha$  alone (A) or vehicle control (B) as determined by one-way ANOVA and Dunnett's multiple comparison test ( $n=3-5$ ).

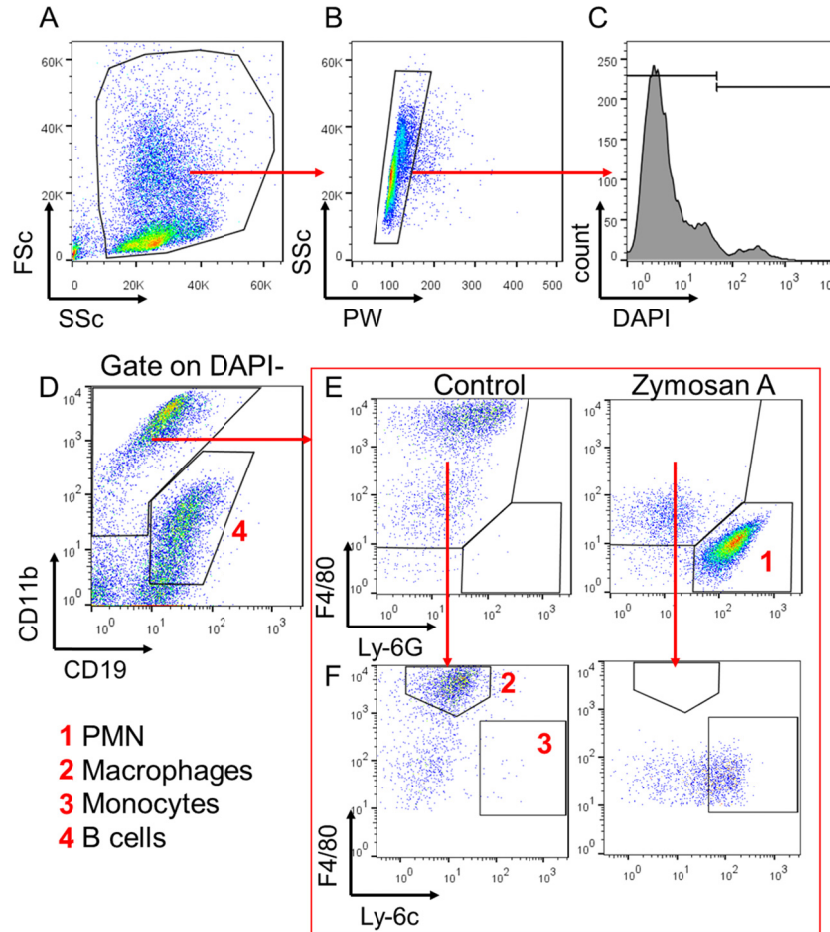

**Figure S3: Gating strategy for flow cytometry analysis of peritoneal cell populations.** A) Peritoneal cells were sequentially gated based on B) Sizing (Pulse width versus side scatter (SSc); C) Exclusion of death or dying cells (DAPI positive) and D) CD11b<sup>+</sup>, CD19<sup>-</sup> to exclude B-cells and other lymphocytes from cells of the monocytic lineage including monocytes, macrophages and PMN as described in the Experimental procedures section. E) Representative dot plots of PMN (Ly-6G<sup>+</sup>) after gating on non-B-cells (defined in D as CD11b<sup>+</sup>, CD19<sup>-</sup>) in naïve peritoneal lavage (control) and zymosan-A challenged exudates (12h). F) Dot plots of macrophages (F4/80<sup>+</sup>, Ly-6c<sup>-</sup>) and monocytes (F4/80<sup>-</sup>, Ly-6c<sup>+</sup>) after gating on non-B-cells (defined in D as CD11b<sup>+</sup>, CD19<sup>-</sup>) in naïve peritoneal lavage (control) and zymosan-A induced inflammation (12h). Cell populations are identified as follows: 1 PMN: CD11b<sup>+</sup>, CD19<sup>-</sup>, F4/80<sup>-</sup>, Ly-6G<sup>+</sup>; 2 Macrophages: CD11b<sup>+</sup>, CD19<sup>-</sup>, F4/80<sup>high</sup>; 3 Monocytes: CD11b<sup>+</sup>, CD19<sup>-</sup>, F4/80<sup>int</sup>, Ly-6G<sup>-</sup>, Ly-6c<sup>+</sup>; 4 B cells: CD11b<sup>+</sup>, CD19<sup>+</sup>.

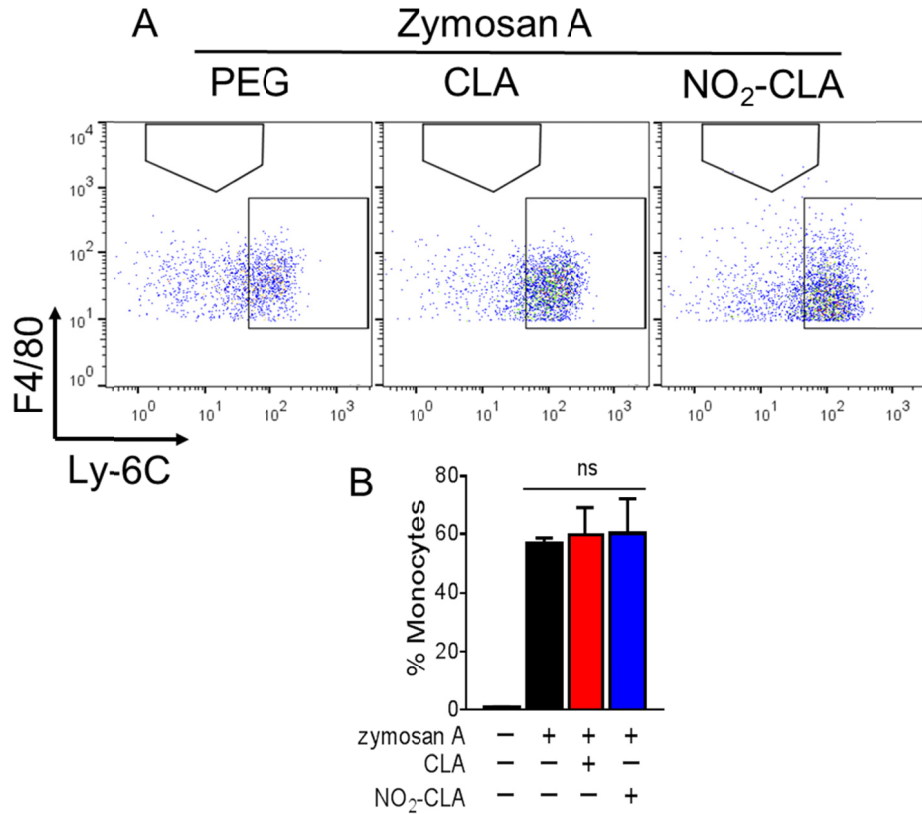

**Figure S4: Monocyte recruitment is not altered by NO<sub>2</sub>-CLA.** A) Representative flow cytometry dot plot of exudate cells from either vehicle (PEG), CLA (2.5 mg) or NO<sub>2</sub>-CLA (2.5 mg/kg) treated animals 12 hours after zymosan-A injection. B) At the maximal amplitude of PMN recruitment (12h), monocyte infiltration proceeding to a resolving stage is not altered by CLA or NO<sub>2</sub>-CLA (n = 6).

**Table S1: Primer sequences for RT-qPCR analysis**

| Gene    | Species   | Accession Number | Forward primer                        | Reverse Primer                        | Amplicon Size |
|---------|-----------|------------------|---------------------------------------|---------------------------------------|---------------|
| 18s RNA | H,R,<br>M | X03205           | 5'-<br>GGAAGGGCACCACCAGGAG<br>T-3'    | 5'-<br>TGCAGCCCCGGACATCTAA<br>G-3'    |               |
| NOS 2   | M         | NM_010927        | 5'-<br>GTTCTCAGCCCAACAATAC<br>AAGA-3' | 5'-<br>GTGGACGGGTCGATGTCAC-<br>3'     | 127bp         |
| IL6     | M         | NM_031168        | 5'-<br>TAGTCCTTCCTACCCCAATT<br>TCC-3' | 5'-<br>TTGGTCCTTAGCCACTCCTT<br>C-3'   | 76bp          |
| NQO 1   | M         | NM_008706        | 5'-<br>AGGATGGGAGGTACTCGAA<br>TC-3'   | 5'-<br>AGGCGTCCTTCCTTATATGC<br>TA-3'  | 144bp         |
| HO-1    | M         | NM_010442        | 5'-<br>AAGCCGAGAATGCTGAGTT<br>CA-3'   | 5'-<br>GCCGTGTAGATATGGTACA<br>AGGA-3' | 100bp         |
